# Supplementary material for: The Geraniin-Rich Extract from Reunion Island Endemic Medicinal Plant Phyllanthus phillyreifolius Inhibits Zika and Dengue Virus Infection at Non-Toxic Effect Doses in Zebrafish
Source: PubMed Central journal article supplement (PMC7287739; doi:10.3390/molecules25102316), 2020-05-15
Supplement: molecules-25-02316-s001.pdf [file molecules-25-02316-s001.pdf]

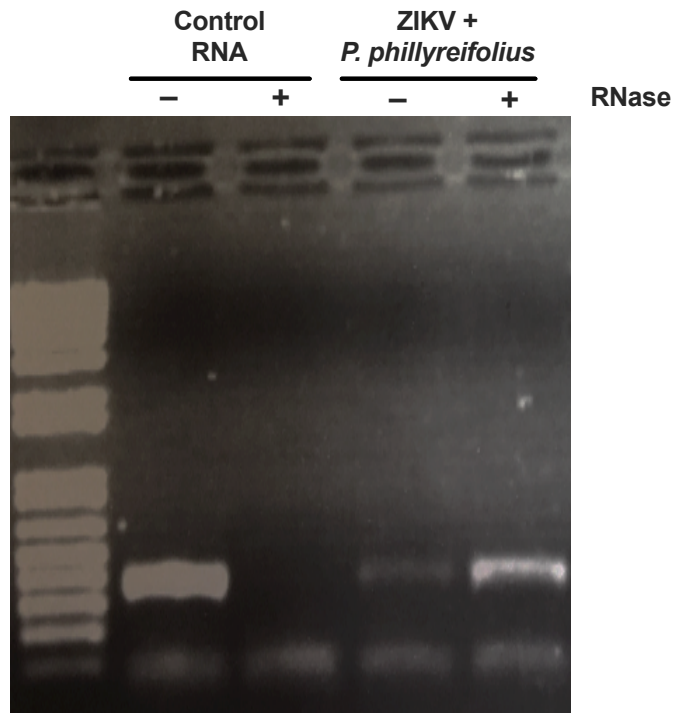

**Figure S1. Effect of *P. phillyreifolius* on ZIKV infectivity.** RNase A protection assay on ZIKV. ZIKV particles was incubated with 250  $\mu\text{g}/\text{mL}$  of *P. phillyreifolius* extract or mock-treated in presence of RNase A for 1 h at 37°C. Viral RNA was extracted and amplified by RT-PCR with ZIKV E primers. Viral RNA extracted from ZIKV and treated with RNase A or vehicle served as controls. Results from a representative experiment (n = 3 repeats) are shown.
